# Supplementary material
Source: PubMed Central journal article supplement (PMC3792431)
Supplement: cdd2013110x1.pdf [file cdd2013110x1.pdf]

**Table S1, Primers, siRNAs and LNA-probe used in this study**

**For cloning**

GAS5-R1-5.1  
TTCTAGAGCTAGCGAATTCTTTTCGAGGTAGGAGTCGACT  
GAS5-Not1-3.1  
TCGCAGATCCTTGCGGCCGCTGGATTGCAAAAATTTATTAA  
miR-21-pCDH-R1-5.1  
ATTCTAGAGCTAGCGAATTCTGATTGAACTTGTTTCATTTT  
miR-21-pCDH-Not1-3.1  
TCGCAGATCCTTGCGGCCGCAAGACTATCCCCATTTCTCCA  
GAS5-miR21-BS-M-5.1  
ACAAATGAATTACAGATCAGGTGAAGTTGAAATGGTGGAG  
GAS5-miR21-BS-M-3.1  
ACCTGATCTGTAATTCATTTGTGTGCCAATGGCTTGAG  
miR-21-GAS5-mt-5.1  
TCTTCCATCAGACCGCGATTGACTGTTGAATCTCATG  
miR-21-GAS5-mt-3.1  
TCAATCGCGGTCTGATGGAAGACCCGACAAGGTGGTACAG

**For RNA precipitation**

T7-GAS5-5.1  
TAATACGACTCACTATAGGGTTTCGAGGTAGGAGTCGACT  
T7-GAS5-Not1-3.1  
GCGGCCGCTGGATTGCAAAAATTTATTAA

**For RT-PCR**

GAS5-RT-5.1  
CTTCTGGGCTCAAGTGATCCT  
GAS5-RT-3.1  
TTGTGCCATGAGACTCCATCAG  
GAS5-RT-3.1A  
CTTGCTCCACACAGTGTAGT  
  
U77-RT-5.1  
CAGATACTATGATGGTTGCA  
U77-RT-3.1  
GACAGATAGTACATCTCTTC  
U44-RT-5.1  
CCTGGATGATGATAAGCAA  
U44-RT-3.1  
AGTCAGTTAGAGCTAATtaa  
Pre-miR-21-RT-5.1  
GCTTATCAGACTGATGTTGACTG  
Pre-miR-21-RT-3.1  
CAGCCCATCGACTGGTG

Pri-miR-21-RT-5.1  
TGTTTTGCCTACCATCGTGA  
Pri-miR-21-RT-3.1  
AAGTGCCACCAGACAGAAGG

**siRNAs**

GAS5-siRNA-1  
CUUGCCUGGACCAGCUUAAdTdT  
GAS5-siRNA-2  
AAGCUGGAAGUUGAAAUGGdTdT

**LNA oligo**

GAS5-LNA probe  
Bio-T+T+A+CCCAAGC+A+AGTCATCCATGGA+T+A+A

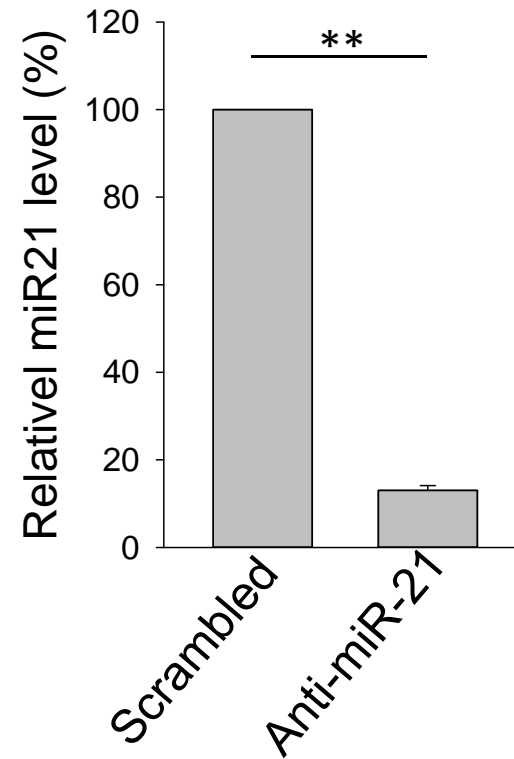

Fig. S1 Suppression of miR-21 by anti-miR-21. Total RNA was isolated from the cells 24 h after transfection, followed by qRT-PCR. Error bars represent SEM, n = 3. \*\*, p < 0.01.

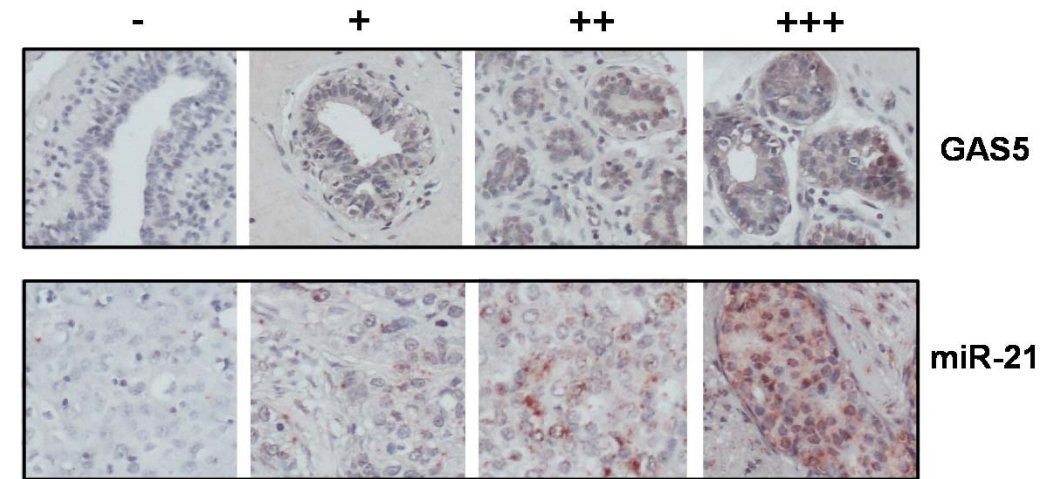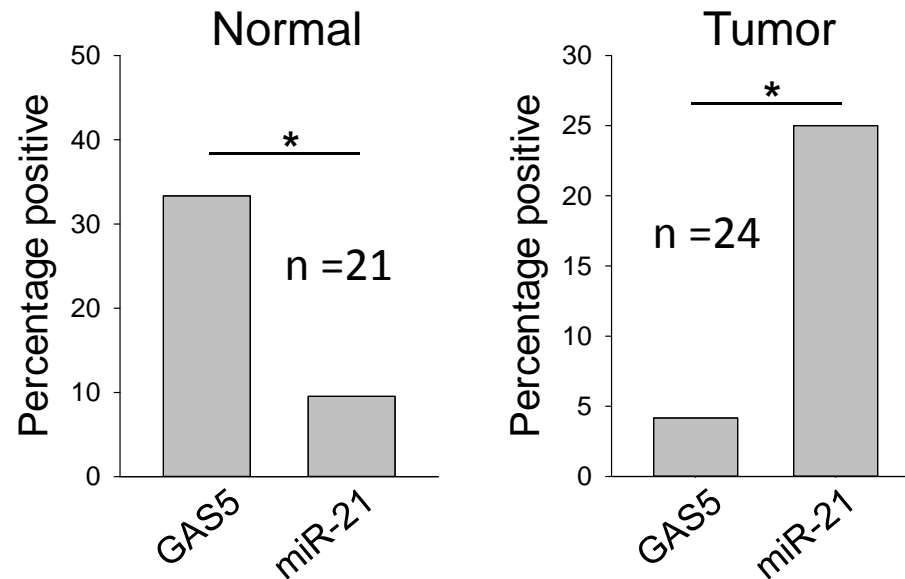

Fig. S2. A, Detection of GAS5 and miR-21 in breast cancer tissue microarrays by in situ hybridization. A, Signal intensity scale. B, Statistical analysis with McNemar's Test. The TMA consists of 24 normal and 24 tumor cores. No cells were seen in three cores and they were removed. Positive: ++ or +++; Negative: - or +. \*,  $p < 0.05$ .

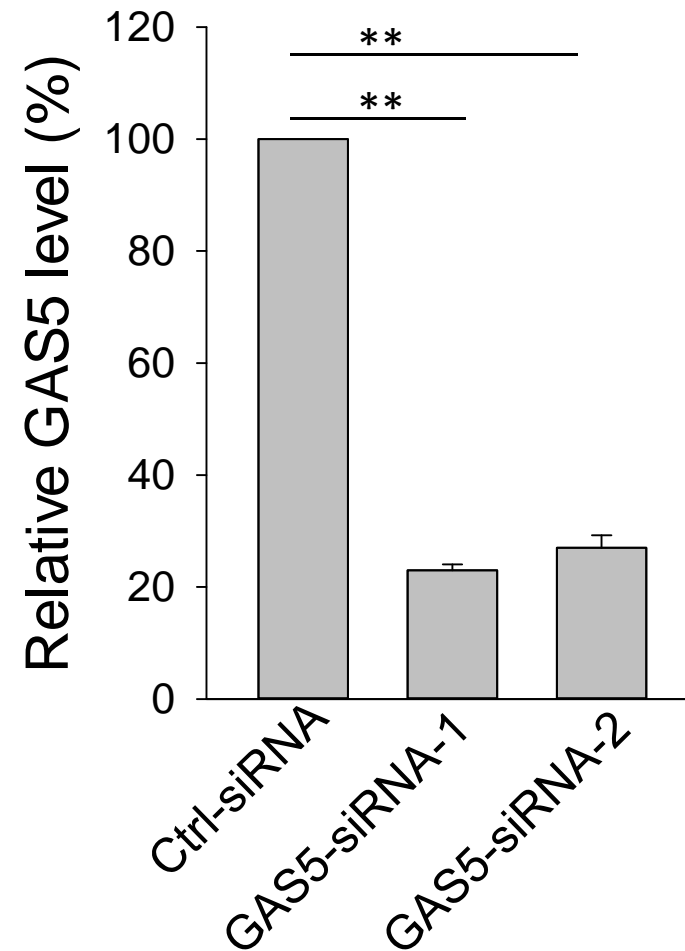

Fig. S3 Suppression of GAS5 by GAS5-siRNAs. Total RNA was isolated from the cells 24 h after transfection, followed by qRT-PCR. Error bars represent SEM, n = 3. \*\*, p < 0.01.

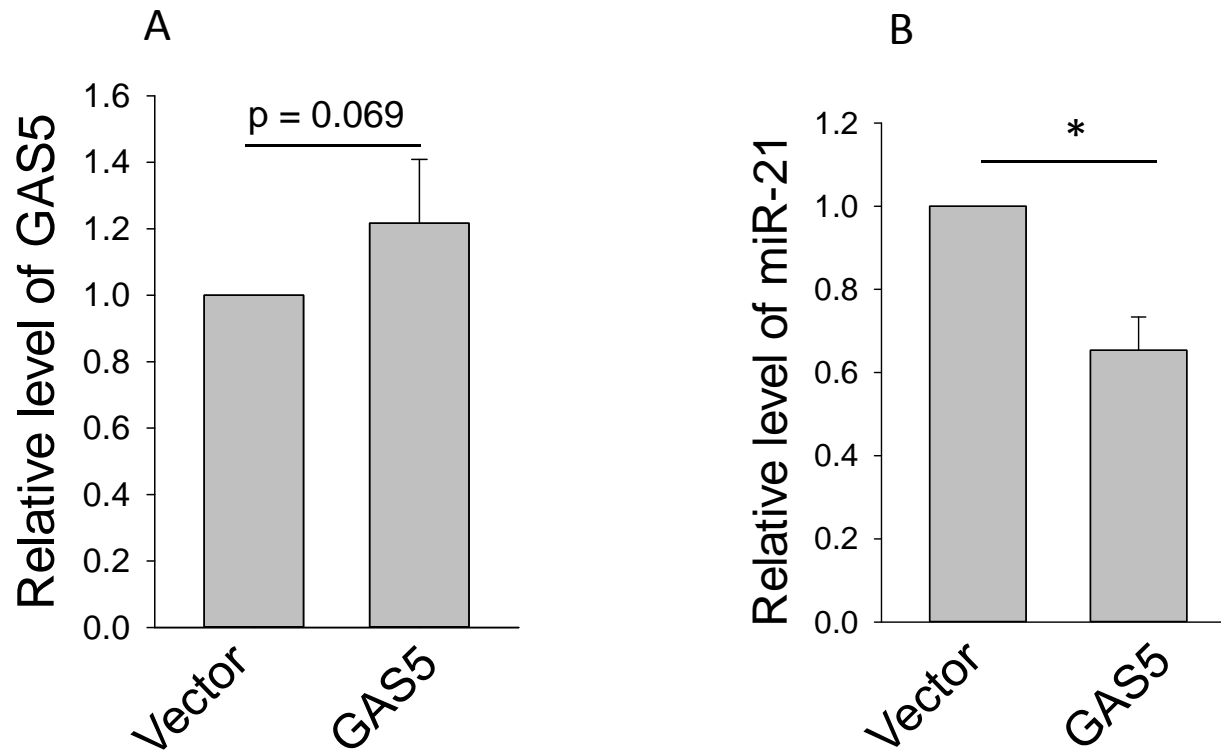

Fig. S4 Effect of GAS5 on miR-21 in the xenograft-derived tumors . Total RNA was isolated from freshly frozen tumors and subject to qRT-PCR. A, Detection of GAS5 in tumors derived from GAS5 infected cells. B, Detection of miR-21 in the same tumor samples. Error bars represent SEM, n = 3. \*, p < 0.05.

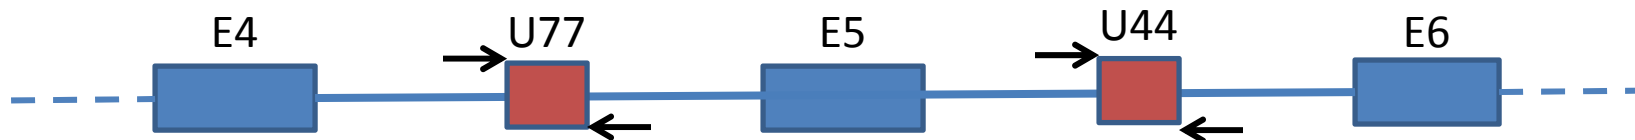

Fig. S5 Relative positions of snoRNA U77 and U44 to GAS5. U77 is between exon4 (E4) and exon 5 (E5); U44 is between exon5 and exon6 (E6). Arrows are primers used to amplify U77 and U44, respectively.
